# Supplementary material for: Different Formation Pathways of Nitrogen-containing Organic Compounds in Aerosols and Fog Water in Northern China
Source: Copernicus journal article supplement (doi:10.5194/egusphere-2024-74), 2024-02-05
Supplement: Supplementary file 1 [file egusphere-2024-74-supplement.pdf]

*Supplement for*

## **Different Formation Pathways of Nitrogen-containing Organic Compounds in Aerosols and Fog Water in Northern China**

Wei Sun<sup>1,2</sup>, Xiaodong Hu<sup>3</sup>, Yuzhen Fu<sup>4</sup>, Guohua Zhang<sup>1,2,\*</sup>, Yujiao Zhu<sup>5</sup>, Xinfeng Wang<sup>5</sup>, Caiqing Yan<sup>5</sup>,  
5 Likun Xue<sup>5</sup>, He Meng<sup>6</sup>, Bin Jiang<sup>1,2</sup>, Yuhong Liao<sup>1,2</sup>, Xinming Wang<sup>1,2</sup>, Ping'an Peng<sup>1,2</sup>, and Xinhui  
Bi<sup>1,2,\*</sup>

<sup>1</sup> State Key Laboratory of Organic Geochemistry and Guangdong Key Laboratory of Environmental Protection and Resources Utilization, Guangzhou Institute of Geochemistry, Chinese Academy of Sciences, Guangzhou, 510640, PR China

10 <sup>2</sup> Guangdong-Hong Kong-Macao Joint Laboratory for Environmental Pollution and Control, Guangzhou Institute of Geochemistry, Chinese Academy of Sciences, Guangzhou 510640, PR China

<sup>3</sup> Jiangmen Laboratory of Carbon Science and Technology, Hong Kong University of Science and Technology (Guangzhou), Jiangmen 529199, PR China

<sup>4</sup> Hainan Research Academy of Environmental Sciences, Haikou 571126, PR China

<sup>5</sup> Environment Research Institute, Shandong University, Qingdao 266237, PR China

15 <sup>6</sup> Qingdao Eco-environment Monitoring Center of Shandong Province, Qingdao 266003, PR China

*Correspondence to:* Bi X.H. ([bixh@gig.ac.cn](mailto:bixh@gig.ac.cn)); Zhang G.H. ([zhanggh@gig.ac.cn](mailto:zhanggh@gig.ac.cn))

### **Text S1. The solid-phase extraction operation**

For FT-ICR MS analysis, water-soluble organic compounds in fog water and aerosols extract were isolated using solid-phase extraction (SPE). The SPE cartridges (Strata-X, Phenomenex, USA) were pre-conditioned sequentially with 3 mL of isopropanol, 6 mL of acetonitrile, 6 mL of methanol containing 0.1% of formic acid, and 6 mL of ultrapure water containing 0.1% formic acid. Then, 10 mL of fog water and aerosols extracts with pH adjusted to 4.5 using formic acid were added to the cartridge at a flow rate of approximately 1 mL min<sup>-1</sup>. The inorganic salts were removed from the cartridge using 4 mL of ultrapure water containing 0.1% formic acid. Note that some low-weight organic molecules are expected to be lost in this step. The cartridges were then freeze-dried, and the analytes were eluted using 3 mL of acetonitrile/methanol/ultrapure water (45/45/10, v:v:v) at pH 10.4, with the pH being adjusted using ammonium hydroxide. All the solvents were HPLC-grade. Blank samples of the fog water and aerosols were processed and analyzed following the same procedure as the samples.

### **Text S2. Instrumental analysis of FT-ICR MS**

A solariX XR FT-ICR MS instrument (Bruker Daltonik GmbH, Bremen, Germany) equipped with a 9.4-T refrigerated, actively shielded superconducting magnet (Bruker Biospin, Wissembourg, France) and a Paracell analyzer cell was used for the analysis in this study. An electrospray ionization (ESI) source (Bruker Daltonik GmbH, Bremen, Germany) in both negative and positive ionization modes (ESI<sup>-</sup> and ESI<sup>+</sup>) was used to ionize the organics. The samples were redissolved in 1 mL of methanol and injected into the ESI source at a flow rate of 200  $\mu$ L h<sup>-1</sup>. A nebulizer gas pressure of 1 bar, a dry gas velocity of 4 L min<sup>-1</sup> and temperature of 200°C, and capillary voltages of +/- 4500 V (+4500 and -4500 were used for ESI<sup>-</sup> and ESI<sup>+</sup>, respectively) and the end plate offset -500 V were used for ESI source. An argon-filled hexapole collision pool was operated at 2 MHz and 1400 Vp-p RF amplitude. The time of flight was 0.7 ms and the ion accumulation time was 0.1 s. A total of 128 continuous 4M data FT-ICR transients were co-added to enhance the signal-to-noise ratio and dynamic range. A typical mass-resolving power ( $m/\Delta m_{50\%}$ , where  $\Delta m_{50\%}$  is the magnitude of the mass spectral peak full width at half-maximum peak height) of more than 450,000 at  $m/z$  319 with <0.3 ppm absolute mass error was achieved. The final spectrum was internally calibrated with typical class species peaks in samples using quadratic calibration in DataAnalysis 5.0 (Bruker Daltonics).

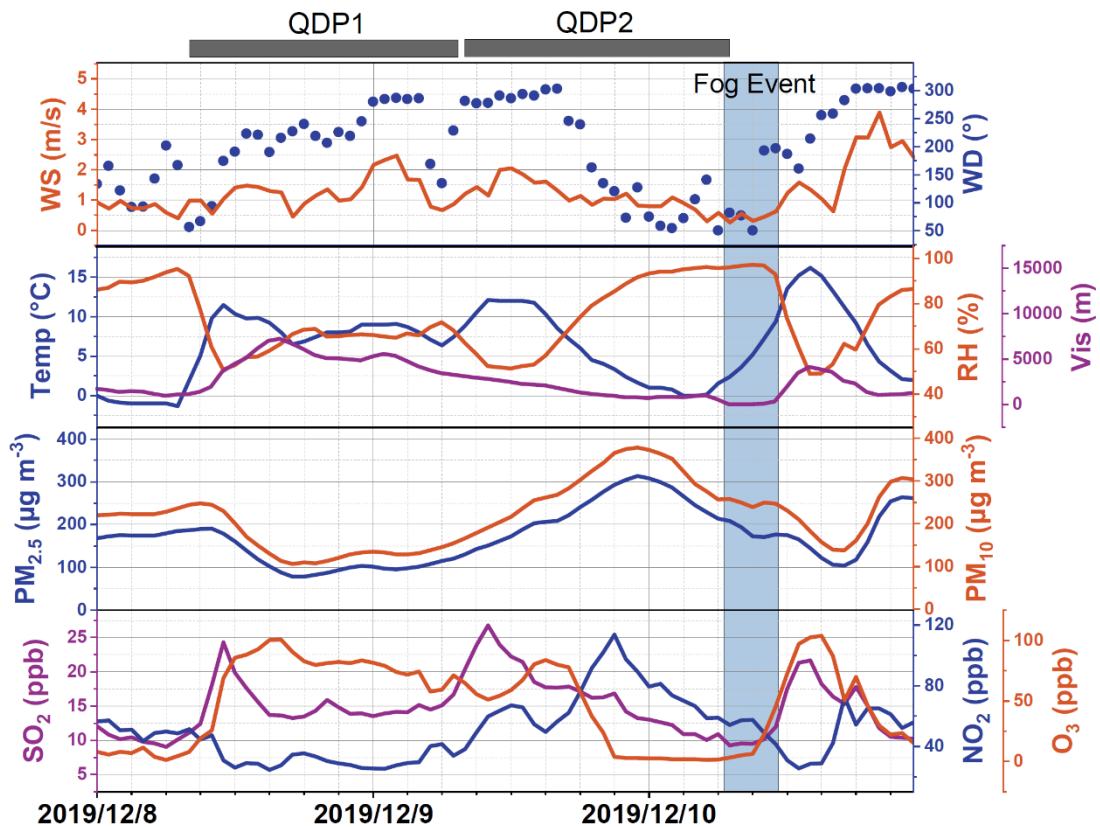

45 **Figure S1.** The detailed temporal variations of meteorological and pollution conditions during the sampling. The grey boxes above the plots represent the starting and ending time of the aerosol sampling. The blue shadow represents the time period of fog event.

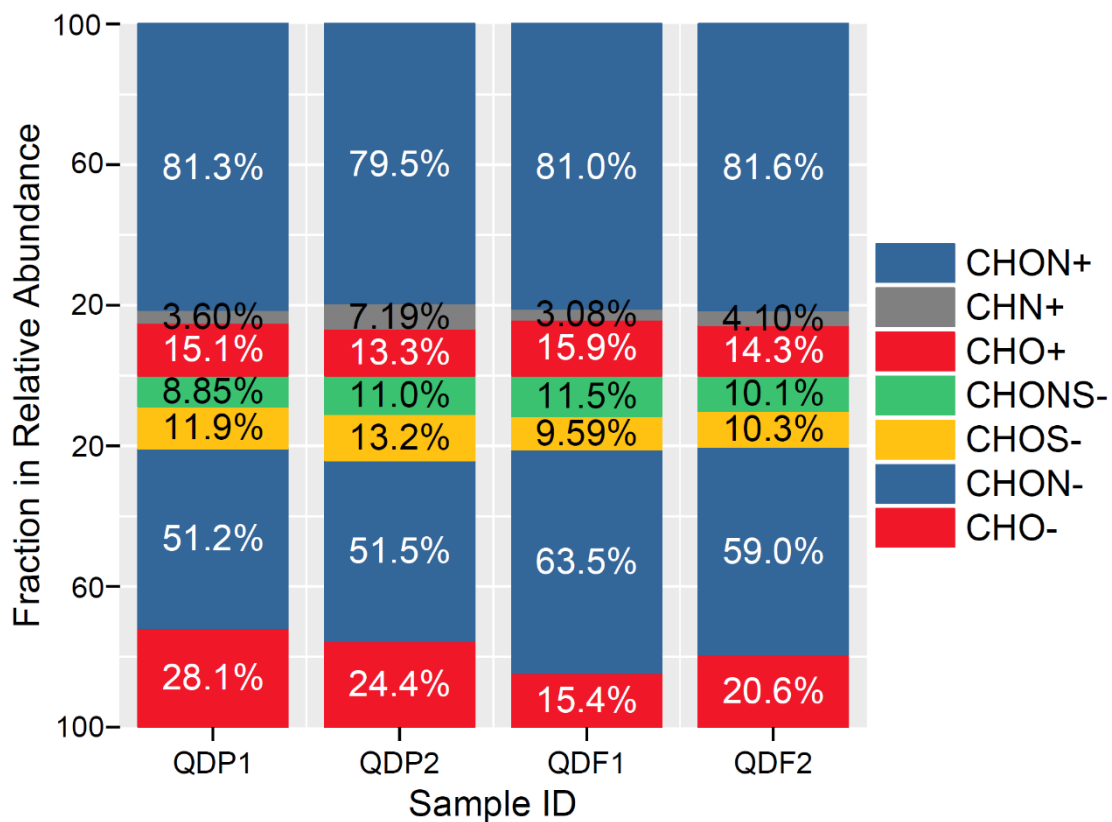

Figure S2. The fraction in relative abundance of the four groups (CHO-, CHON-, CHOS-, and CHONS-) in ESI- mode and three groups (CHO+, CHON+, and CHN+) in ESI+ mode.

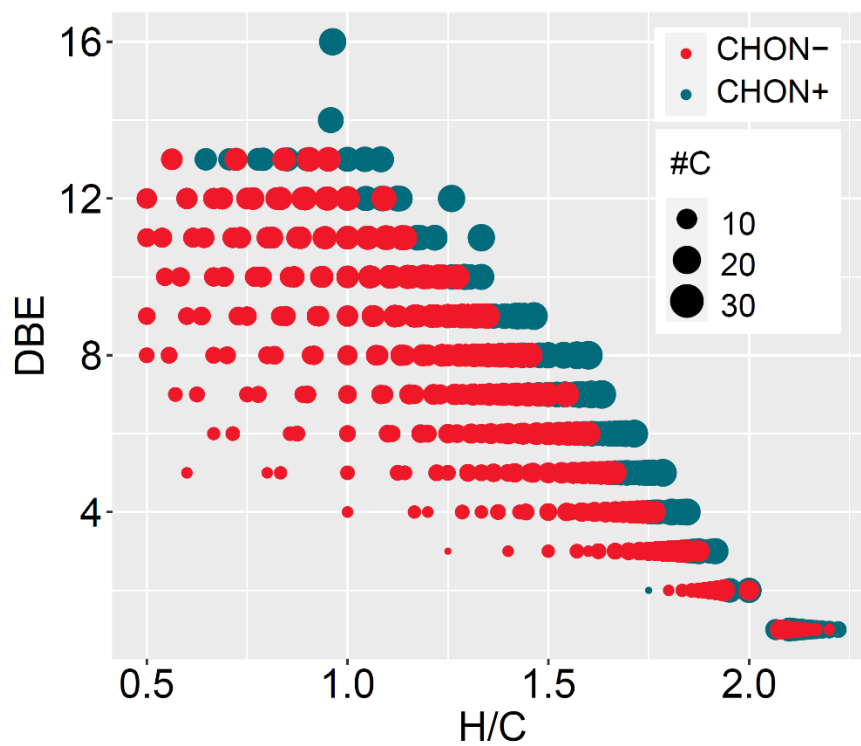

55 **Figure S3.** The plot of DBE versus H/C ratios in pre-fog aerosol sample QDP1. #C in the plot represents the number of carbon atoms in NOC molecules.

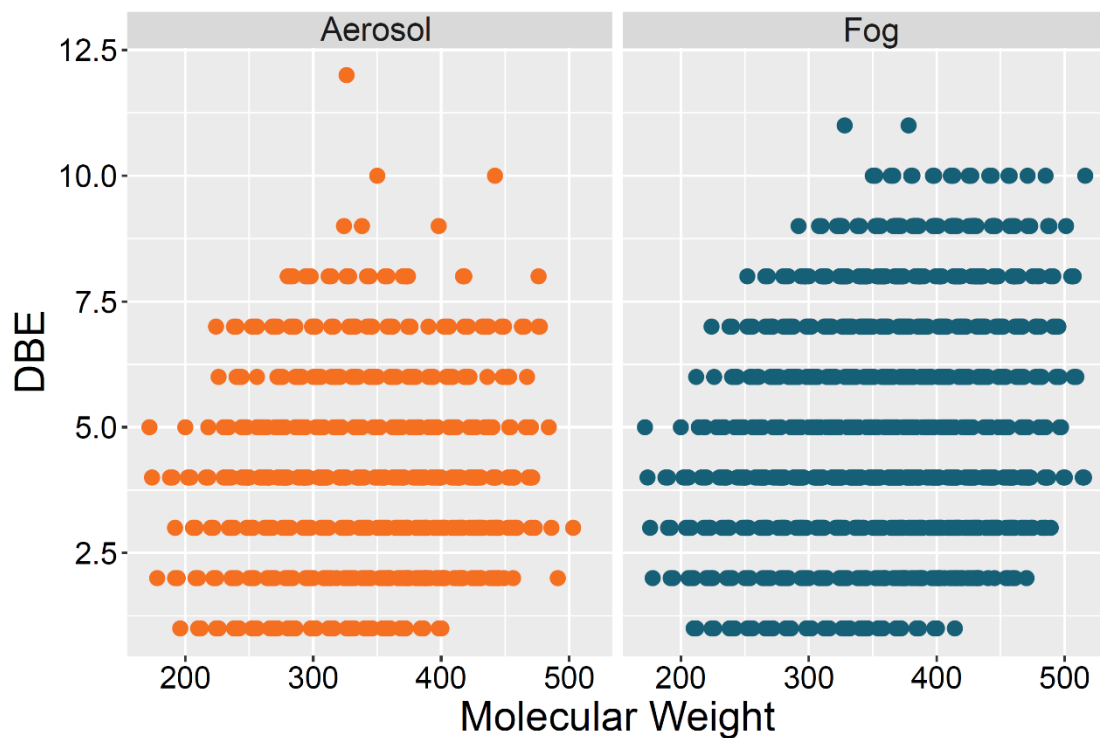

Figure S4. The plot of DBE versus molecular weight of CHONS- in aerosols and fog water.

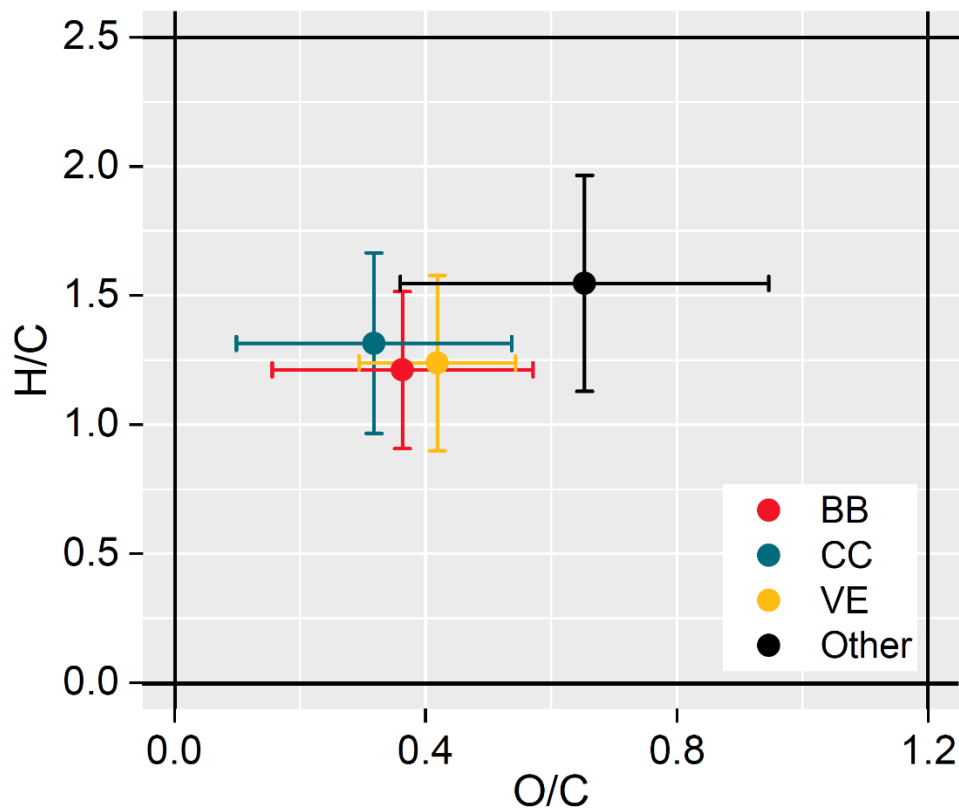

60

Figure S5. The Van Krevelen diagram for NOCs from different sources (Biomass burning, BB; Coal combustion, CC; Vehicle emission, VE, and other sources, OtherSource) in pre-fog aerosols. The dots in the plot represent the average values of O/C and H/C, and the error bars represent standard deviation.

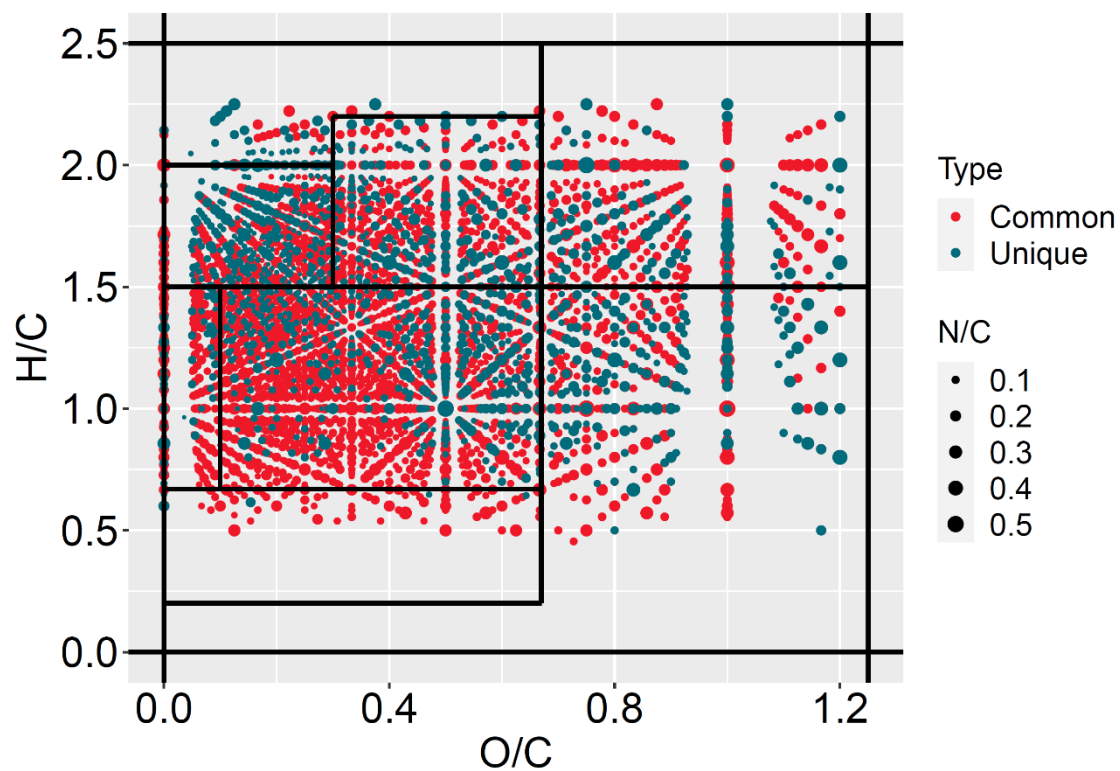

65

Figure S6. The Van Krevelen diagram for common and unique NOC molecules in fog water compared with pre-fog aerosols.



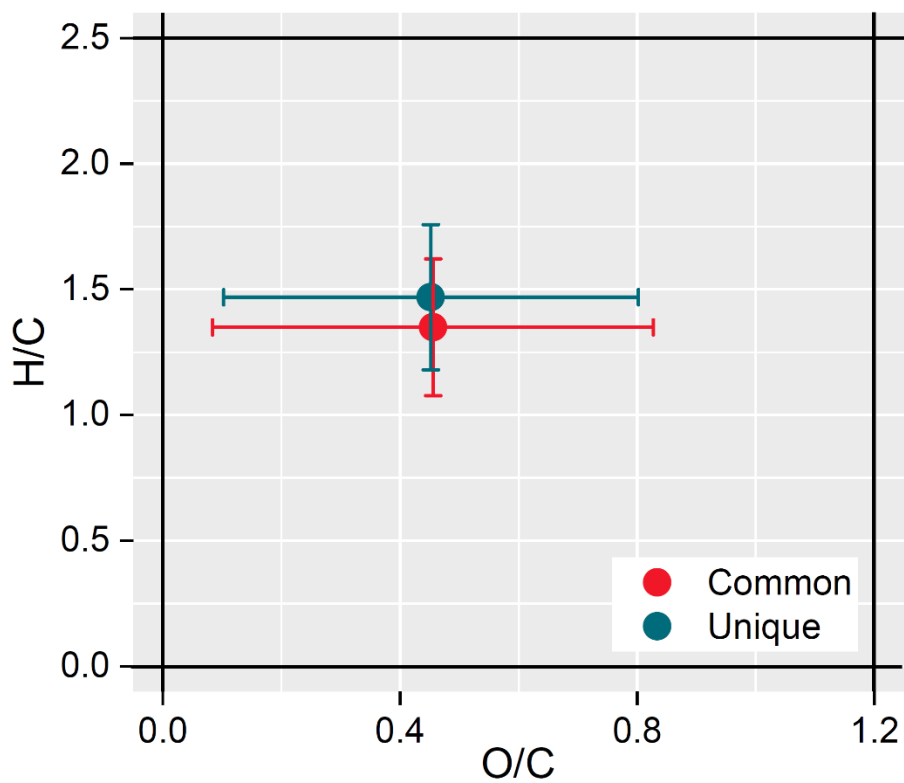

70 **Figure S7.** The Van Krevelen diagram for common and unique NOC molecules in fog water compared with pre-fog aerosols. The dots in the plot represent the average values of O/C and H/C, and the error bars represent standard deviation.

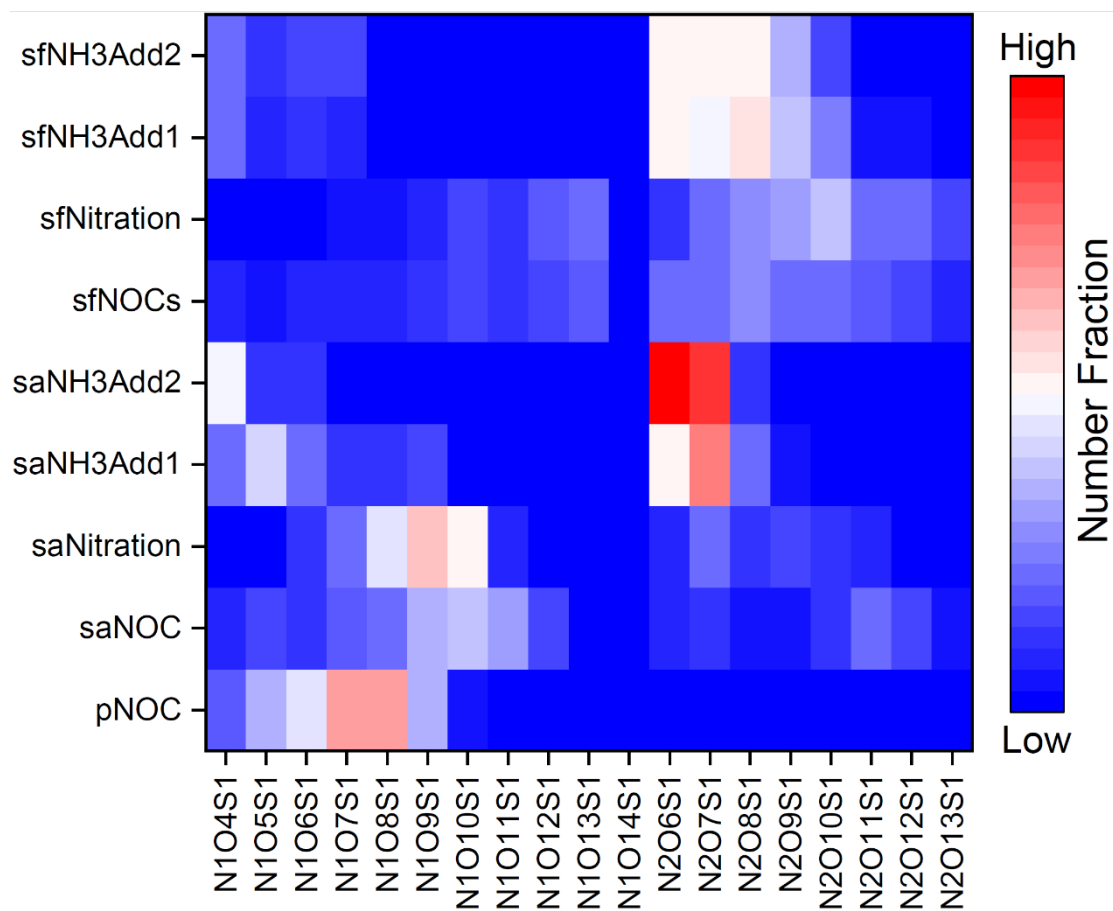

75 Figure S8. The heatmap of subclasses of CHONS divided by the number of N, O, and S atoms in pNOCs, asNOCs, and fsNOCs.

**Table S1. The reactions considered in the “precursor-product pair” analysis.**

| Reaction Type                       | Transformation Reaction                                                            | Variation of atoms                            |
|-------------------------------------|------------------------------------------------------------------------------------|-----------------------------------------------|
| Dealkyl group                       | demethylation                                                                      | -CH <sub>2</sub>                              |
| Dealkyl group                       | Di-demethy or Deethylation                                                         | -C <sub>2</sub> H <sub>4</sub>                |
| Dealkyl group                       | Deisopropyl                                                                        | -C <sub>3</sub> H <sub>6</sub>                |
| Dealkyl group                       | Dealkylation                                                                       | -C <sub>2</sub> H <sub>2</sub>                |
| Oxygen addition                     | Hydroxylation/N or S-oxidation                                                     | +O                                            |
| Oxygen addition                     | Carbonylation/Methyl to aldehyde/Alcohol to carboxylic acid/Primary amine to nitro | -H <sub>2</sub> +O                            |
| Oxygen addition                     | Hydration                                                                          | +H <sub>2</sub> O                             |
| Oxygen addition                     | Methyl to carboxylic acid                                                          | -H <sub>2</sub> +O <sub>2</sub>               |
| Oxygen addition                     | Oxygen addition                                                                    | +O <sub>2</sub>                               |
| Oxygen addition                     | Oxygen addition                                                                    | +O <sub>3</sub>                               |
| Oxygen addition                     | Oxidation of carbon-carbon double bond                                             | +H <sub>2</sub> O <sub>2</sub>                |
| Reaction of carboxylic acid         | Decarboxylation                                                                    | -CO <sub>2</sub>                              |
| Reaction of carboxylic acid         | Loss of acetic acid                                                                | -C <sub>2</sub> H <sub>2</sub> O <sub>2</sub> |
| Reaction of carboxylic acid         | Reductive displacement of carboxylic acid                                          | -COOH+OH                                      |
| Reaction of carboxylic acid         | Decarboxylation to carbonyl/Loss of aldehyde                                       | -CH <sub>2</sub> O                            |
| Reaction of carboxylic acid         | Decarboxylation to peroxide                                                        | -C                                            |
| Reaction of amine                   | Deamination                                                                        | -NH                                           |
| Reaction of amine                   | Oxydative displacement of amine                                                    | -NH <sub>2</sub> +OH                          |
| Reaction of amine                   | Deamination to ketone                                                              | -NH <sub>3</sub> +O                           |
| Reaction of amine                   | Demethylamine to hydroxy                                                           | -CH <sub>3</sub> NH+OH                        |
| Reaction of amine                   | Oxidation of tertiary amine                                                        | -N+HO <sub>2</sub>                            |
| Reaction of amine                   | deamidization                                                                      | -CONH+H <sub>2</sub>                          |
| Reaction of amine                   | Hydrolysis of amide                                                                | -CONH+H <sub>2</sub> O                        |
| Reaction of the nitro/nitroso group | Loss of nitro group                                                                | -NO <sub>2</sub> +H                           |
| Reaction of the nitro/nitroso group | Nitroso reduction/Reductive displacement of oxygen                                 | -O+H <sub>2</sub>                             |
| Reaction of the nitro/nitroso group | Oxidative displacement of nitro group                                              | -NO <sub>2</sub> +OH                          |
| Reaction of the nitro/nitroso group | Nitration                                                                          | -H+NO <sub>2</sub>                            |
| Reaction of sulfur                  | Loss of molecular nitrogen                                                         | -N <sub>2</sub>                               |
| Reaction of sulfur                  | Oxidative displacement of methyl to alcohol                                        | -CH <sub>2</sub> +O                           |

|                    |                                                                               |                                  |
|--------------------|-------------------------------------------------------------------------------|----------------------------------|
| Reaction of sulfur | Oxidative displacement of methyl to ketone                                    | -CH <sub>4</sub> +O              |
| Ammonium Addition  | Reaction of aldehydes or ketones with ammonia                                 | -O+NH                            |
| Ammonium Addition  | Reaction of imine with carbonyls present in the skeleton of the same molecule | -HO <sub>2</sub> +N              |
| Other reactions    | Desulfonation                                                                 | -SO <sub>2</sub>                 |
| Other reactions    | Desulfurization                                                               | -S                               |
| Other reactions    | Oxidative displacement of sulfhydryl/Oxidative displacement of sulfur         | -SH+OH                           |
| Other reactions    | Dehydrogenation                                                               | -H <sub>2</sub>                  |
| Other reactions    | Hydrogenation                                                                 | +H <sub>2</sub>                  |
| Other reactions    | Loss of oxygen                                                                | -O                               |
| Other reactions    | Dehydration                                                                   | -H <sub>2</sub> O                |
| Other reactions    | Deacetylation                                                                 | -C <sub>2</sub> H <sub>2</sub> O |

**Table S2. The number of products formed by nitration and NH<sub>3</sub> addition reactions in pre-fog aerosols and fog water, the number of that detected by ESI- and ESI+, and the number ratios of that detected by two ionization modes.**

|                    |           | Total Number | Numb. In ESI+ | Numb. In ESI- | NR+/- |
|--------------------|-----------|--------------|---------------|---------------|-------|
| Pre-Fog<br>Aerosol | Nitration | 450          | 64            | 407           | 0.16  |
|                    | NH3Add1   | 228          | 117           | 137           | 0.85  |
|                    | NH3Add2   | 120          | 61            | 80            | 0.76  |
| Fog Water          | Nitration | 352          | 73            | 290           | 0.25  |
|                    | NH3Add1   | 374          | 181           | 215           | 0.84  |
|                    | NH3Add2   | 390          | 182           | 233           | 0.78  |

85 **Table S3. The criteria for the division of seven categories in the VK plot.**

| Category                    | H/C                      | O/C                      |
|-----------------------------|--------------------------|--------------------------|
| Lipid-like                  | $1.5 < H/C \leq 2.0$     | $0 \leq O/C \leq 0.3$    |
| Aliphatic/peptides-like     | $1.5 < H/C \leq 2.2$     | $0.3 < O/C \leq 0.67$    |
| CRAMs-like structures       | $0.67 < H/C \leq 1.5$    | $0.1 \leq O/C < 0.67$    |
| Carbohydrates-like          | $1.5 < H/C \leq 2.25$    | $0.67 < O/C \leq 1.2$    |
| Unsaturated hydrocarbons    | $0.67 < H/C \leq 1.5$    | $O/C < 0.1$              |
| Aromatic structures         | $0.2 \leq H/C \leq 0.67$ | $O/C < 0.67$             |
| Highly Oxygenated Compounds | $0.6 < H/C \leq 1.5$     | $0.67 \leq O/C \leq 1.2$ |
